# CosMIC: A Consistent Metric for Spike Inference from Calcium Imaging

**Stephanie Reynolds<sup>1,2</sup>, Therese Abrahamsson<sup>3</sup>, P. Jesper Sjöström<sup>3</sup>, Simon R. Schultz<sup>2,4</sup> and Pier Luigi Dragotti<sup>1</sup>**

<sup>1</sup>Department of Electrical and Electronic Engineering, Imperial College London, South Kensington Campus, London SW7 2AZ, UK.

<sup>2</sup>Centre for Neurotechnology, Imperial College London, South Kensington Campus, London SW7 2AZ, UK.

<sup>3</sup>Centre for Research in Neuroscience, Brain Repair and Integrative Neuroscience Program, Department of Neurology and Neurosurgery, The Research Institute of the McGill University Health Centre, Montréal General Hospital, Montréal, Québec H3G 1A4, Canada.

<sup>4</sup>Department of Bioengineering, Imperial College London, South Kensington Campus, London SW7 2AZ, UK.

**Keywords:** Two-photon calcium imaging, Spike detection, Spike train similarity.

## Abstract

1 In recent years, the development of algorithms to detect neuronal spiking activity from  
2 two-photon calcium imaging data has received much attention. Meanwhile, few re-  
3 searchers have examined the metrics used to assess the similarity of detected spike  
4 trains with the ground truth. We highlight the limitations of the two most commonly  
5 used metrics, the spike train correlation and success rate, and propose an alternative,  
6 which we refer to as CosMIC. Rather than operating on the true and estimated spike  
7 trains directly, the proposed metric assesses the similarity of the pulse trains obtained  
8 from convolution of the spike trains with a smoothing pulse. The pulse width, which  
9 is derived from the statistics of the imaging data, reflects the temporal tolerance of the  
10 metric. The final metric score is the size of the commonalities of the pulse trains as a  
11 fraction of their average size. Viewed through the lens of set theory, CosMIC resembles  
12 a continuous Sørensen-Dice coefficient — an index commonly used to assess the sim-  
13 ilarity of discrete, presence/absence data. We demonstrate the ability of the proposed  
14 metric to discriminate the precision and recall of spike train estimates. Unlike the spike  
15 train correlation, which appears to reward overestimation, the proposed metric score is  
16 maximised when the correct number of spikes have been detected. Furthermore, we  
17 show that CosMIC is more sensitive to the temporal precision of estimates than the  
18 success rate.

# 1 Introduction

Two-photon calcium imaging has enabled neuronal population activity to be monitored in vivo in behaving animals (Dombeck et al., 2010; Peron et al., 2015). Modern microscope design allows neurons to be imaged at sub-cellular resolution in volumes spanning multiple brain areas (Sofroniew et al., 2016). Coupled with the current generation of fluorescent indicators (Chen et al., 2013), which have sufficient sensitivity to read out single spikes, this imaging technology has great potential to further our understanding of information processing in the brain.

The fluorescent probe, however, does not directly report spiking activity. Rather, it reads out a relatively reliable indicator of spiking activity — a cell’s intracellular calcium concentration — from which spike times must be inferred. A diverse array of techniques have been proposed for this task, including deconvolution approaches (Vogelstein et al., 2010; Friedrich et al., 2017; Pachitariu et al., 2017), methods that identify the most likely spike train given a signal model (Vogelstein et al., 2009; Deneux et al., 2016) and approaches that exploit the sparsity of the underlying spike train (Oñativia et al., 2013). To enable the investigation of neural coding hypotheses, reconstructed spike trains must have sufficient temporal precision for analysis of synchrony between neurons and behavioural variables (Huber et al., 2012), whilst accurately inferring the rate of spiking activity.

Although the development of spike detection algorithms has received a lot of recent attention, few researchers have examined the metrics used to assess an algorithm’s performance. At present, there is no consensus in the best choice of metric. In fact, from our survey, 44% of papers presenting a new method assess its performance using a metric unique to that paper. This inconsistency impedes progress in the field — algorithms are not directly comparable and, consequently, data collectors cannot easily select the optimal algorithm for a new dataset.

The two most commonly used metrics, the spike train correlation (STC) and the success rate, are not well-suited to the task. The STC, which is invariant under linear transformations of the inputs, is not able to discriminate the similarity of the rates of two spike trains (Paiva et al., 2010). Moreover, the temporal binning that occurs prior to spike train comparison impairs the STC’s ability to compare spike train synchrony (Paiva et al., 2010). These limitations suggest that the STC, whilst a quick and intuitive method, is not appropriate for assessing an algorithm’s spike detection performance. The success rate, which does accurately compare spike rates, does not reward increasing temporal precision above a given threshold. Consequently, it is not an appropriate metric for evaluating an algorithm’s performance when the end goal is, for example, to investigate the synchrony of activations within a network.

In this paper, we present a metric that can discriminate both the temporal and rate precision of an estimated spike train with respect to the ground truth spike train. Unlike the STC, we do not bin the spike trains. Rather, spike trains are convolved with a smoothing pulse that allows comparison of spike timing with an implicit tolerance. The similarity between the resulting pulse trains is subsequently assessed. This type of continuous approach is also preferred by metrics assessing the relationship between spike trains from different neurons (van Rossum, 2001; Schreiber et al., 2003). We set the pulse width to reflect the temporal precision that an estimate is able to achieve given the

1 statistics of the dataset. As such, the metric is straightforward to implement since there  
2 are no parameters to tune. For convenience, we refer to the proposed metric as CosMIC  
3 — a Consistent Metric for spike Inference from Calcium imaging. In the following, we  
4 demonstrate CosMIC’s ability to discriminate spike train similarity on real and simu-  
5 lated data. We include comparisons against the two most commonly used metrics, the  
6 spike train correlation and the success rate, and against two metrics designed to assess  
7 similarity between spike trains from different neurons (Victor and Purpura, 1997; van  
8 Rossum, 2001).

## 9 **2 Constructing the metric**

10 In this paper, we present a metric for comparing the similarity of two sets of spikes:  
11 a ground truth set,  $S = \{t_k\}_{k=1}^K$ , and a set of estimates,  $\hat{S} = \{\hat{t}_k\}_{k=1}^{\hat{K}}$ . Due to limiting  
12 factors, such as noise and model mismatch, it is improbable that an estimate will match  
13 a true spike with infinite temporal precision. As such, we do not expect that  $\hat{t}_j = t_k$  for  
14 any  $j$  or  $k$ . Rather, we wish to reward estimates within a reasonable range of accuracy  
15 given the limitations of the data. We achieve this by leveraging results from fuzzy set  
16 theory (Zimmermann, 2010).

17 In contrast to classical sets, to which an element either belongs or does not be-  
18 long, fuzzy sets contain elements with a level of certainty represented by a membership  
19 function — the higher the value of the membership function, the more certain the mem-  
20 bership. In the following, we define two fuzzy sets,  $S_\epsilon$  and  $\hat{S}_\epsilon$ , which represent the  
21 original sets of spikes,  $S$  and  $\hat{S}$ , with a level of temporal tolerance defined by a param-  
22 eter  $\epsilon$ . We set  $\epsilon$  to reflect the temporal precision that an estimate is able to achieve given  
23 the statistics of a dataset (see Section 3). The corresponding membership functions  $y(t)$   
24 and  $\hat{y}(t)$ , which are defined for  $t \in \mathbb{R}$ , are calculated through convolution of the spike  
25 trains,

$$x(t) = \sum_{k=1}^K \delta(t - t_k) \quad \text{and} \quad \hat{x}(t) = \sum_{k=1}^{\hat{K}} \delta(t - \hat{t}_k), \quad (1)$$

26 with a triangular pulse,  $p_\epsilon(t)$ , such that  $y(t) = x(t) * p_\epsilon(t)$  and  $\hat{y}(t) = \hat{x}(t) * p_\epsilon(t)$ .  
27 The resulting functions have local maxima at the locations of the respective sets of  
28 spikes (Fig. 1A). As  $x(t)$  and  $\hat{x}(t)$  are analogous to the membership functions of the  
29 classical sets of spikes, we can think of the convolution as a temporal smoothing of the  
30 membership. The pulse that we employ is a triangular B-spline (Fig. 1B),

$$p_\epsilon(t) = \begin{cases} \frac{\epsilon - |t|}{\epsilon} & |t| \leq \epsilon, \\ 0 & \text{otherwise.} \end{cases} \quad (2)$$

31 Using this triangular pulse means that, the further a time point,  $t$ , is from a spike, the  
32 less weight the membership function receives at that point. Past a certain distance,  
33  $\epsilon$ , the membership function receives no weight. Many pulse shapes could be chosen  
34 to introduce this grading of temporal precision, we select a triangular pulse as it is  
35 straightforward to examine analytically and implement computationally.

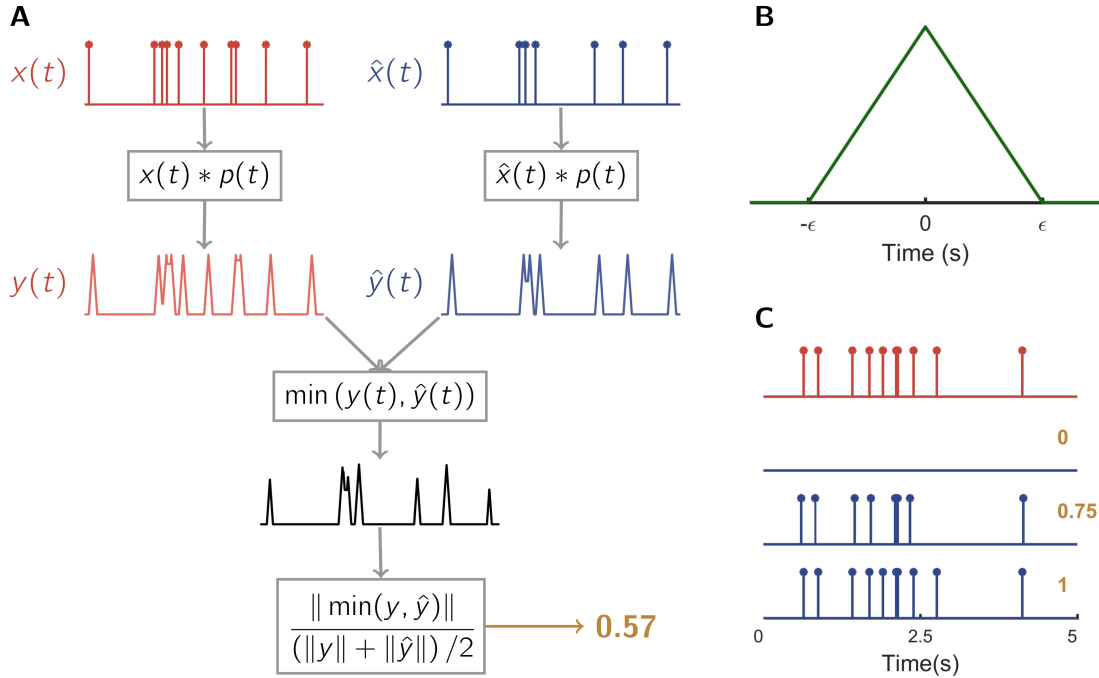

Figure 1: A flow diagram of the proposed metric. The ground truth spike train and estimated spike train are convolved with a triangular pulse (**B**), whose width is determined by the statistics of the data. The metric compares the difference between the resulting pulse trains (**A**). Metric scores are in the range  $[0, 1]$  — a perfect estimate achieves score 1 and an empty spike train is scored 0 (**C**).

1 We design the proposed metric to quantify the size of the intersection of the fuzzy  
 2 sets of true and estimated spikes with respect to the average size of the sets, such that

$$M(\mathbf{S}, \hat{\mathbf{S}}) = \frac{\mu(\mathbf{S}_\epsilon \cap \hat{\mathbf{S}}_\epsilon)}{(\mu(\mathbf{S}_\epsilon) + \mu(\hat{\mathbf{S}}_\epsilon)) / 2}, \quad (3)$$

3 where  $\mu$  is the L1-norm:  $\mu(\mathbf{S}_\epsilon) = \|y\| = \int_{\mathbb{R}} |y(t)| dt$ . An analogous formula was  
 4 presented for discrete fuzzy sets by Pappis and Karacapilidis (1993). Our formula can  
 5 be interpreted as the continuous version of the Sørensen-Dice coefficient (Dice, 1945;  
 6 Sørensen, 1948) — a score which is commonly used to assess the similarity of discrete,  
 7 presence/absence data. Also known as the F1-score, in the context of spike detection,  
 8 the Sørensen-Dice coefficient is referred to as the success rate (Section 4.1).

9 The membership function of an intersection of sets is the minimum of their respec-  
 10 tive membership functions. It follows that

$$\mu(\mathbf{S}_\epsilon \cap \hat{\mathbf{S}}_\epsilon) = \|\min(y, \hat{y})\| = \int_{\mathbb{R}} |\min(y(t), \hat{y}(t))| dt. \quad (4)$$

11 Taking the minimum of the membership functions produces a conservative represen-  
 12 tation of the intersection of two sets; in our context, spikes that appear in one spike  
 13 train and not in the other are removed (Fig. 2A) and spikes that are detected with poor  
 14 temporal precision are assigned less weight (Fig. 2B and 2C).

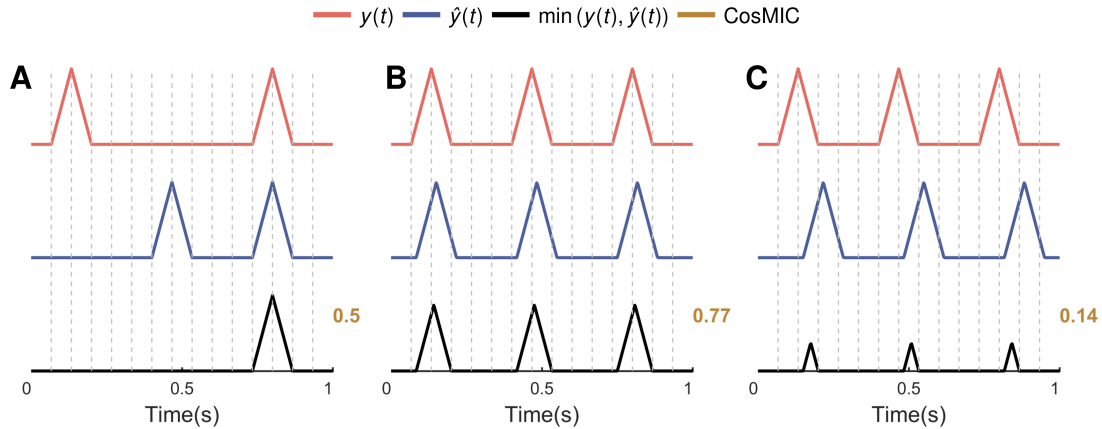

Figure 2: The proposed metric quantifies the commonalities of the sets of true and estimated spikes as a proportion of the average size of those sets. Commonalities are found by taking the minimum of the pulse trains — as such, spikes that appear in only one pulse train are excluded (A) and estimates with lower temporal precision receive a lower score (B and C).

1 The metric can also be written in alternative form

$$M(\mathbf{S}, \hat{\mathbf{S}}) = 1 - \frac{\|y - \hat{y}\|}{\|y\| + \|\hat{y}\|}, \quad (5)$$

2 the derivation of which is shown in Appendix A.1. From Eq. (5), it is clear that the  
 3 maximal score of 1 is achieved when the membership functions, and therefore the sets  
 4 of true and estimated spikes, are equivalent. The minimal score of 0 is achieved when  
 5 the support of the membership functions do not overlap, i.e. no estimates are within the  
 6 tolerance of the metric (Fig. 1C).

## 7 2.1 Ancestor metrics

8 Like the success rate, CosMIC can alternatively be derived from a pair of metrics, which  
 9 we refer to as ancestor metrics. The first of these metrics measures the proportion of  
 10 ground truth spikes that were detected within the precision of the pulse width, such that

$$11 \quad R_{\text{CosMIC}} = \frac{\mu(\mathbf{S}_\epsilon \cap \hat{\mathbf{S}}_\epsilon)}{\mu(\mathbf{S}_\epsilon)} = \frac{\|\min(y, \hat{y})\|}{\|y\|}. \quad (6)$$

12 This score is analogous to the recall of a spike train estimate, one of the ancestor met-  
 13 rics from which the success rate is formed. The second of CosMIC’s ancestor metrics  
 14 measures the proportion of estimated spikes that detect a ground truth spike within the  
 15 precision of the pulse width, such that

$$16 \quad P_{\text{CosMIC}} = \frac{\mu(\mathbf{S}_\epsilon \cap \hat{\mathbf{S}}_\epsilon)}{\mu(\hat{\mathbf{S}}_\epsilon)} = \frac{\|\min(y, \hat{y})\|}{\|\hat{y}\|}. \quad (7)$$

16 This is analogous to the precision, the second metric used to compute the success rate.  
 17 Finally, computing the harmonic mean of the two ancestor metrics and rearranging, we

1 obtain CosMIC:

$$2 \frac{R_{\text{CosMIC}} * P_{\text{CosMIC}}}{R_{\text{CosMIC}} + P_{\text{CosMIC}}} = 2 \frac{\frac{\mu(\mathbf{S}_\epsilon \cap \hat{\mathbf{S}}_\epsilon)}{\mu(\mathbf{S}_\epsilon)} \frac{\mu(\mathbf{S}_\epsilon \cap \hat{\mathbf{S}}_\epsilon)}{\mu(\hat{\mathbf{S}}_\epsilon)}}{\frac{\mu(\mathbf{S}_\epsilon \cap \hat{\mathbf{S}}_\epsilon)}{\mu(\mathbf{S}_\epsilon)} + \frac{\mu(\mathbf{S}_\epsilon \cap \hat{\mathbf{S}}_\epsilon)}{\mu(\hat{\mathbf{S}}_\epsilon)}} = 2 \frac{\mu(\mathbf{S}_\epsilon \cap \hat{\mathbf{S}}_\epsilon)}{\mu(\mathbf{S}_\epsilon) + \mu(\hat{\mathbf{S}}_\epsilon)} = M(\mathbf{S}, \hat{\mathbf{S}}). \quad (8)$$

2 The analogy to the success rate can be seen clearly from the presentation of that metric  
3 in Section 4.1.

## 4 **3 Temporal error tolerance**

5 The width of the triangular pulse with which the spike trains are convolved reflects the  
6 accepted tolerance of an estimated spike's position with respect to the ground truth. To  
7 set this width, we calculate a lower bound on the temporal precision of the estimate  
8 of one spike — the Cramér-Rao bound (CRB) — from the statistics of the data. The  
9 CRB reports the lower bound on the mean square error of any unbiased estimator (Kay,  
10 1993). It is therefore useful as a benchmark; an estimator that achieves the CRB should  
11 be awarded a relatively high metric score. In Section 3.1, we detail the calculation of the  
12 CRB. In Section 3.2, we outline how we use this bound to determine the pulse width.  
13 Then, in Section 3.3, we provide practical advice on the calculation of the bound.

### 14 **3.1 Cramér-Rao bound for spike detection**

15 We consider the problem of estimating the location of one spike,  $t_0$ , from noisy calcium  
16 imaging data. The fluorescence signal is modelled as

$$f(t) = A (e^{-\alpha(t-t_0)} - e^{-\gamma(t-t_0)}) 1_{t>t_0}, \quad (9)$$

17 where  $\alpha$ ,  $\gamma$  and  $A$  are parameters that determine the shape and amplitude of the calcium  
18 transient. We assume that we have access to  $N$  noisy samples, such that

$$y[n] = f[n] + \xi[n], \quad n \in \{0, 1, \dots, N-1\}, \quad (10)$$

19 where  $\xi[n]$  are independent samples of a zero-mean Gaussian process with standard de-  
20 viation  $\sigma$  and  $f[n] = f(nT)$  are samples of the fluorescence signal with time resolution  
21  $T$ . The CRB on the uncertainty in the estimated position of  $t_0$  is

$$\text{CRB}(t_0) = \left[ \frac{A^2}{\sigma^2} \sum_{n=0}^{N-1} (\alpha e^{-\alpha(nT-t_0)} - \gamma e^{-\gamma(nT-t_0)})^2 1_{nT>t_0} \right]^{-1}. \quad (11)$$

22 This bound was first presented by Schuck et al. (2017). The bound is derived by calcu-  
23 lating the inverse of the Fisher Information, which, in the case of samples corrupted by  
24 independent, zero-mean, Gaussian noise, is

$$I(t_0) = \frac{1}{\sigma^2} \sum_{n=0}^{N-1} \left( \frac{\partial f}{\partial t_0}(nT) \right)^2,$$

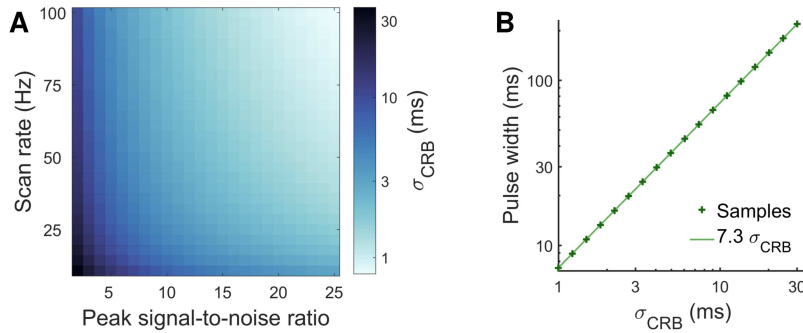

Figure 3: The pulse width is set to reflect the temporal precision achievable given the statistics of the dataset. We calculate the Cramér-Rao bound (CRB),  $\sigma_{\text{CRB}}^2$ , a lower bound on the mean square error of the estimated location of one spike from calcium imaging data (A). This bound decreases as the scan rate (Hz) and peak signal-to-noise ratio (squared calcium transient peak amplitude/noise variance) increase. We set the pulse width to ensure that an estimate of one spike at the temporal precision of the CRB achieves, on average, a score of 0.8. This results in a pulse width of approximately  $7.3 \sigma_{\text{CRB}}$  (B).

- 1 where  $\partial f / \partial t_0$  is the derivative of the fluorescence signal with respect to the spike time,  
 2  $t_0$ :

$$\frac{\partial f}{\partial t_0}(nT) = A (\alpha e^{-\alpha(nT-t_0)} - \gamma e^{-\gamma(nT-t_0)}) 1_{nT > t_0}.$$

3 In this work, we use the CRB to set the temporal tolerance of the metric. In order  
 4 that the CRB holds for an arbitrarily placed spike, we remove the dependency on the  
 5 true spike time by averaging the result over several values of  $t_0$ . We compute  $\sigma_{\text{CRB}}^2 =$   
 6  $\frac{1}{M} \sum_{m=1}^M \text{CRB}(t_0^m)$ , where  $t_0^m$  are evenly placed in the interval  $(nT, (n+1)T)$  for a fixed  
 7  $n$ . In Fig. 3, we plot  $\sigma_{\text{CRB}}$  as the sampling rate and peak signal-to-noise ratio (PSNR)  
 8 of the data vary. The PSNR is computed as  $A_{\text{peak}}^2 / \sigma^2$ , where  $\sigma$  is the standard deviation  
 9 of the noise and  $A_{\text{peak}}$  is the peak amplitude (maximum) of the fluorescence signal in  
 10 Eq. (9). For this example, we use  $\alpha = 3.18\text{s}^{-1}$  and  $\gamma = 34.49\text{s}^{-1}$ ; the parameters for a  
 11 Cal-520 AM pulse (Tada et al., 2014). We see that the CRB decreases as either the scan  
 12 rate or the PSNR of the data increases.

### 13 3.2 Pulse width

14 The CRB can be used as a benchmark for temporal precision of any unbiased estimator.  
 15 As such, we set the pulse width to ensure that, on average, an estimate at the precision  
 16 of the CRB achieves a relatively high score. We set the benchmark metric score at 0.8,  
 17 as this represents a relatively high value in the range of the metric, which is between 0  
 18 and 1. The importance of this score is not the particular benchmark value — there are  
 19 a range of values that give similar performance — but rather that it is a reproducible  
 20 number with a clear interpretation. In this paper, we characterise the discrimination  
 21 performance of CosMIC with a benchmark value of 0.8, so that its scores can be inter-  
 22 preted when applied to spike inference algorithms on real data. The benchmark value

1 was set lower than the metric’s maximum value, 1, so that the score does not saturate  
2 when the model assumptions are not ideally satisfied. On real data, the noise may not  
3 be stationary ( $\sigma$  may vary in time), and so algorithms may appear to outperform the  
4 CRB. A benchmark score of 0.8 means that the metric score does not saturate in this  
5 scenario.

6 We consider a true spike at  $t_0$  and an estimate,  $U$ , normally distributed around it at  
7 the precision of the CRB, such that  $U \sim \mathcal{N}(t_0, \sigma_{\text{CRB}}^2)$ . Then, we fix the pulse width so  
8 that, on average,  $\mathbb{E}[M(t_0, U)] = 0.8$ . In Appendix A.3, we show that this condition is  
9 satisfied when

$$0.4 = (\Phi(1/\beta) - 0.5) (\beta^2 + 1) + \frac{\beta}{\sqrt{2\pi}} (\exp(-1/2\beta^2) - 2), \quad (12)$$

10 where  $\beta = \sigma_{\text{CRB}}/w$ ,  $w$  is the pulse width and  $\Phi$  denotes the cumulative distribution  
11 function of the standard normal distribution. We observe that the pulse width that solves  
12 this equation is approximately equal to  $7\sigma_{\text{CRB}}$  (Fig. 3B).

### 13 3.3 Implementation

14 Code to implement the metric can be found at [github.com/stephanieray/metric](https://github.com/stephanieray/metric) along  
15 with a demonstration. In order to use the metric, one must have estimates of the fluores-  
16 cence signal parameters,  $\{\alpha, \gamma, A, \sigma\}$ , see Eq. (9). In the following, we provide some  
17 guidance on the estimation of these parameters. Alternative strategies have been sug-  
18 gested by numerous model-based algorithms, whose spike detection procedures utilise  
19 a subset of the above parameters (Vogelstein et al., 2009; Pnevmatikakis et al., 2013,  
20 2016; Deneux et al., 2016).

21 The standard deviation of the noise,  $\sigma$ , can be computed as the sample standard  
22 deviation of a portion of the data in which there were no calcium transients. The pa-  
23 rameters that determine the speed of the rise and decay of the pulse —  $\alpha$  and  $\gamma$  —  
24 are predominantly defined by characteristics of the fluorescent indicator that was used  
25 to generate the imaging data. In Table 1, we provide documented values of  $\alpha$  and  $\gamma$   
26 for four commonly used fluorescent indicators, extracted from the corresponding refer-  
27 ences: Cal-520 AM (Tada et al., 2014), OGB-1 AM (Lütcke et al., 2013), GCaMP6f  
28 and GCaMP6s (Chen et al., 2013). These values can be used as a guideline; in practise,  
29 they will vary with the indicator expression level as well as the cell type. We note that  
30 the time taken for a calcium transient to rise to its peak and the decay time are functions  
31 of both  $\alpha$  and  $\gamma$ ; the values presented in Table 1 are thus not easily interpretable in terms  
32 of the shape of a calcium transient pulse.

33 It is typically necessary for a spike detection algorithm to estimate the value of  
34 the amplitude parameter,  $A$ , in order to detect spikes. Indeed, Vogelstein et al. (2009)  
35 integrate this step into the spike detection procedure, iteratively estimating the spike  
36 locations and the amplitude, amongst other parameters. If, however,  $A$  is not known,  
37 we recommend that the parameter is fit from the data samples and the signal model,  
38 such that

$$g(t) = b(t) + A \sum_{k=1}^K (e^{-\alpha(t-t_k)} - e^{-\gamma(t-t_k)}) 1_{t>t_k}, \quad (13)$$



| Fluorescent indicator | $\alpha$ (s <sup>-1</sup> ) | $\gamma$ (s <sup>-1</sup> ) |
|-----------------------|-----------------------------|-----------------------------|
| GCaMP6f               | 4.88                        | 60.97                       |
| GCaMP6s               | 1.26                        | 15.16                       |
| OGB-1 AM              | 1.5                         | 101.5                       |
| Cal-520 AM            | 3.18                        | 34.39                       |

Table 1: To calculate CosMIC’s pulse width, the parameters that define the speed of rise and decay of the calcium transient,  $\alpha$  and  $\gamma$ , are required. Here, we provide documented values of these parameters for four commonly used fluorescent indicators.

1 where  $b(t)$  is a baseline component and  $\alpha$ ,  $\gamma$  are the estimated pulse shape parameters.  
2 When the baseline component is constant and there is no indicator saturation, this is a  
3 linear problem. In practise, a neuron’s spike amplitude is not constant over time. In fact,  
4 depending on the fluorescent indicator, the amplitude may increase (Chen et al., 2013)  
5 or saturate (Lütcke et al., 2013) at high spike rates. We recommend that the amplitude  
6 parameter is fit from a subset of the data in which neither saturation nor supra-linear  
7 amplitudes are present.

## 8 4 Numerical experiments

9 To assess the discriminative ability of CosMIC, we simulate true and estimated spike  
10 trains in various informative scenarios. We compare CosMIC with the two most com-  
11 monly used metrics in the spike inference literature, which we define in Sections 4.1  
12 and 4.2 for completeness. We also compare against two metrics designed to assess the  
13 similarity of spike trains from different neurons. We define the metrics of Victor and  
14 Purpura (1997) and van Rossum (2001) in Sections 4.3 and 4.4, respectively.

### 15 4.1 Success rate

16 The success rate, which is defined as a function of the true and false positive rates  
17 or, alternatively, as a function of precision and recall, appears in various forms in the  
18 literature. Spike inference performance has been assessed using true and false positive  
19 rates (Rahmati et al., 2016), precision and recall analysis (Reynolds et al., 2017) and  
20 using the complement of the success rate, the error rate (Deneux et al., 2016). We study  
21 this class of metrics under the umbrella of the success rate, which we define here.

22 A ground truth spike is deemed to have been ‘detected’ if there is an estimate within  
23  $\delta_1/2$  (s) of that spike, where  $\delta_1$  is a free parameter. Only one estimate can be deemed to  
24 detect one ground truth spike. The recall is the percentage of ground truth spikes that  
25 were detected. The precision is the percentage of estimates that detect a ground truth  
26 spike. Then, the success rate is the harmonic mean of the precision and recall, such that

$$27 \text{ success rate} = 2 \frac{\text{precision} * \text{recall}}{\text{precision} + \text{recall}}. \quad (14)$$

28 A binary true detection region centred around each ground truth spike is analogous to

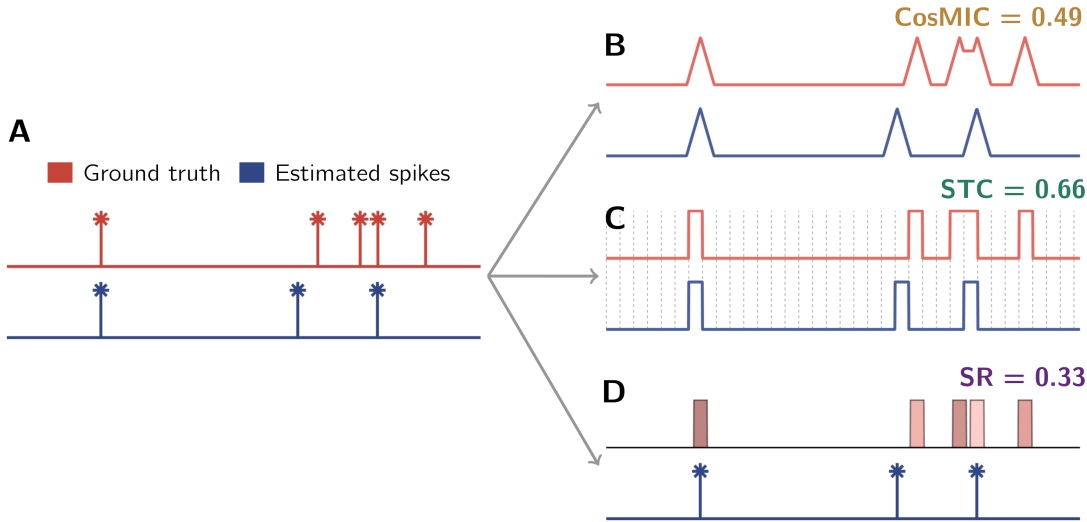

Figure 4: We compare the scores of three metrics: CosMIC, the spike train correlation (STC) and the success rate (SR). None of the metrics compute scores directly from the true and estimated spike trains, shown in A. Rather, CosMIC initially convolves the spike trains with a triangular pulse (B). The STC first discretizes the temporal interval and utilises the counts of spikes in each time bin, the bin edges and counts are plotted in C. The SR uses a bin centered around each true spike — an estimate in that bin is deemed a true detection (D). In order that the metric scores are comparable, we fix the STC and SR bin widths to be equal to CosMIC’s pulse width.

1 an implementation of CosMIC with a box function pulse. To ensure that the success  
 2 rate ‘pulse’ has the same width as CosMIC’s pulse, we set  $\delta_1 = \epsilon$ , where  $\epsilon$  is half the  
 3 pulse width, see Fig. 4.

## 4 4.2 Spike train correlation

5 The first step in the calculation of the spike train correlation (STC) is the discretization  
 6 of the temporal interval into bins of width  $\delta_2$ . Two vectors of spike counts,  $\mathbf{c}$  and  $\hat{\mathbf{c}}$ ,  
 7 are subsequently produced, whose  $i^{\text{th}}$  elements equal the number of spikes in the  $i^{\text{th}}$   
 8 time bin for the true and estimated spike trains, respectively. The STC is the Pearson  
 9 product-moment correlation coefficient of the resulting vectors, i.e.

$$\text{STC} = \frac{\langle \mathbf{c} - m(\mathbf{c}), \hat{\mathbf{c}} - m(\hat{\mathbf{c}}) \rangle}{\sqrt{v(\mathbf{c})} \sqrt{v(\hat{\mathbf{c}})}}, \quad (15)$$

10 where  $\langle \cdot, \cdot \rangle$ ,  $m(\cdot)$  and  $v(\cdot)$ , represent the inner product, sample mean and sample vari-  
 11 ance, respectively. To remain consistent with the success rate, in all numerical experi-  
 12 ments, we define  $\delta_2 = \delta_1 = \epsilon$ .

13 The STC takes values in the range  $[-1, 1]$ . In practise, however, it is rare for a spike  
 14 detection algorithm to produce an estimate that is negatively correlated with the ground  
 15 truth (Berens et al., 2017). Moreover, an estimate with maximal negative correlation is  
 16 equally as informative as one with maximal positive correlation. In this paper, we utilise

1 the normalised spike train correlation, the absolute value of the STC. This ensures that  
2 the range of each metric that we analyse is equivalent (and equal to  $[0,1]$ ) and that, as a  
3 consequence, the distribution of metric values are comparable.

### 4 **4.3 Victor-Purpura dissimilarity**

5 Victor and Purpura (1997) introduced a distance metric to compare the dissimilarity  
6 between sets of spikes from different neurons:  $\mathbf{S}_1 = \{t_k^1\}_{k=1}^{K_1}$  and  $\mathbf{S}_2 = \{t_k^2\}_{k=1}^{K_2}$ . The  
7 distance is the minimum cost of transforming one set of spikes into the other using  
8 a set of three operations: insertion, deletion and temporal shifts of spikes. A cost is  
9 associated with each operation; insertion and deletion both carry a cost of 1, whereas the  
10 cost of a temporal shift depends on the extent of the shift and the value of a parameter,  
11  $q$ . In particular, the cost of transforming one spike into another is

$$K_q(t_k^1, t_j^2) = \begin{cases} q \|t_k^1 - t_j^2\| & \text{if } \|t_k^1 - t_j^2\| < 2/q, \\ 2 & \text{otherwise.} \end{cases} \quad (16)$$

12 If the spikes are within the precision prescribed by the shift parameter,  $2/q$ , the cost  
13 relates to a temporal shift. Otherwise, the cost invoked is the sum of the costs of delet-  
14 ing one spike and inserting another at the correct location. In all experiments, we set  
15  $2/q$  to be equal to CosMIC's pulse width, so that the minimum tolerated precision of  
16 CosMIC and this metric are equivalent. Finally, the distance between two sets of spikes,  
17  $D_{VP}(\mathbf{S}_1, \mathbf{S}_2)$ , is the minimum total cost of the operations transforming one spike train  
18 to the other. A larger score indicates less similar spike trains, whereas the minimum  
19 score, zero, is awarded to identical spike trains.

### 20 **4.4 van Rossum dissimilarity**

21 A distance metric introduced by van Rossum (2001) was also designed to quantify  
22 the dissimilarity between sets of spikes from different neurons. The respective spike  
23 trains are first convolved with a biologically-motivated pulse,  $q(t) = \exp(-t/\tau) 1_{t>0}$ ,  
24 where  $\tau$  is a tunable parameter and  $1$  is the indicator function. The metric score is the  
25 Euclidean distance between the resulting pulse trains,  $f_{1,\tau}$  and  $f_{2,\tau}$ , such that

$$D_{VR}(\mathbf{S}_1, \mathbf{S}_2) = \frac{1}{\tau} \int_0^\infty (f_{1,\tau}(t) - f_{2,\tau}(t))^2 dt. \quad (17)$$

26 Following Kreuz et al. (2007), when computing the score of the van Rossum dissimi-  
27 larity, we set  $\tau$  with respect to the Victor-Purpura metric parameter:  $\tau = 1/q$ .

## 28 **5 Results**

29 To investigate metric properties, we simulated estimated and ground truth spike trains  
30 and analysed the metric scores. To mimic the temporal error in spike time estimation,  
31 unless otherwise stated, estimates were normally distributed about the true spike times.  
32 In the following, we refer to the standard deviation of the normal distribution as the  
33 'jitter' of the estimates.

## 5.1 CosMIC rewards high temporal precision

CosMIC was more sensitive to temporal precision than the STC or success rate (Fig. 5). First, we investigated this characteristic at the level of estimates of a single spike,  $t_{\text{true}}$ . CosMIC depends only on the absolute difference between the estimate,  $t_{\text{est}}$ , and the true spike — the further the distance, the smaller the score. The relationship between CosMIC and the temporal error,  $\delta = t_{\text{true}} - t_{\text{est}}$ , is

$$M(t_{\text{true}}, t_{\text{est}}) = \begin{cases} \left(\frac{|\delta|}{w} - 1\right)^2 & \text{if } |\delta| < w \\ 0 & \text{otherwise,} \end{cases} \quad (18)$$

where  $w$  is the width of the pulse. The derivation of this result is given in Appendix A.2. The success rate, on the other hand, does not reward increasing temporal precision above the bin width; an estimate is assigned a score of 1 or 0, when its precision is above or below the bin width, respectively. Moreover, the STC is asymmetric in the temporal error; estimates the same distance from the true spike are not guaranteed to be awarded the same score, see Fig. 5A. This asymmetry stems from this metric's temporal discretisation. The temporal interval is first discretised into time bins and the number of spikes in each bin are counted (Fig. 4). It follows that estimated spikes that are the same absolute distance from a true spike can fall into different time bins, thus achieving a different score. We note that the STC is always positive in Fig. 5A as, in this paper, we utilise the absolute value of the correlation (see Section 4.2).

On simulated data, we investigated the effect of these properties when spike train estimates, rather than single spikes, were evaluated. In particular, we analysed the metric scores when spike train estimates contained the correct number of spikes but their temporal precision varied. We simulated the ground truth spike train as a Poisson process with rate 1Hz over 200s. The corresponding calcium transient signal was generated assuming a Cal-520 pulse shape (see Table 1) and a sampling rate of 30 Hz. White Gaussian noise was added to the calcium transient signal to generate two fluorescence signals, one with low and the other with relatively high noise (Fig. 5B). The corresponding metric pulse widths, as calculated from the CRB, were 33ms and 78ms, or 1 and 2.3 sample widths, respectively. Spike train estimates were normally distributed about the true spikes with varying jitter. The metric scores were then calculated for 100 realisations of spike train estimates at each jitter level in both the low and high noise settings (Fig. 5C and D, respectively).

As the correct number of spikes were always estimated, the level of jitter represented the quality of a spike train estimate in this setting. Ideally, a metric would reliably reward spike train estimates of the same quality with the same score. The STC, however, took a relatively large range of values for estimates of the same jitter (Fig. 5C and D), despite having the same range as CosMIC and the success rate. This inconsistency is a consequence of the edge effects introduced by binning. Here, we use the term consistency in line with its semantic rather than mathematical definition.

We observed a roughly linear trend in the scores of CosMIC and the success rate (Fig. 5E). As expected, CosMIC was boosted with respect to the success rate when the root mean square error (RMSE) of detected spikes was relatively low when measured as a fraction of the pulse width. In each case, the RMSE was computed empirically

1 from the estimated spikes within the precision of CosMIC and the success rate's pulse  
2 width. Conversely, CosMIC was relatively low with respect to the success rate when the  
3 RMSE was relatively high. This trend is visible in the Bland-Altman plot (Altman and  
4 Bland, 1983; Giavarina, 2015), in which the mean of the two methods is plotted against  
5 the difference. We conclude that CosMIC is more sensitive to the temporal precision  
6 of detected spikes, as, unlike the success rate, it discriminates precision above the bin  
7 width.

## 8 **5.2 CosMIC penalises overestimation**

9 As opposed to the STC, CosMIC and the success rate penalised overestimation of spikes  
10 (Fig. 6). We simulated spike train estimates that were normally distributed about the  
11 true spike times. When the number of detected spikes ( $K_{\text{est}}$ ) was less than the number  
12 of true spikes ( $K_{\text{true}}$ ), the locations about which the estimates were distributed were  
13 chosen without replacement. When  $K_{\text{est}} > K_{\text{true}}$ , the set of locations included all the  
14 true spikes plus a subset of extras chosen with replacement. The overestimation ratio  
15 ( $K_{\text{est}}/K_{\text{true}}$ ) reflects the degree of accuracy to which an estimate matches the rate of a  
16 ground truth spike train. We observed that, rather than penalising overestimation, the  
17 STC increased with the overestimation ratio. In contrast, CosMIC and the success rate  
18 were maximised when the correct number of spikes were detected. This behaviour was  
19 consistent as the jitter of the estimated spikes varied; in this example, the jitter was  $\sigma_{\text{CRB}}$   
20 (Fig. 6A),  $2\sigma_{\text{CRB}}$  (Fig. 6B) and  $3\sigma_{\text{CRB}}$  (Fig. 6C), respectively.

21 It is the type of normalisation used by the STC that caused it to be insensitive to  
22 overestimation. Scaling factors present in the spike count vectors cancel out in the  
23 numerator and denominator, see Eq. (15), rendering the STC invariant under scalar  
24 transformations of the inputs. When the STC was adapted to the continuous-time as-  
25 sessment of spike train similarity, by first convolving spike trains with a smoothing  
26 pulse, this flaw persisted (Paiva et al., 2010).

27 When the spike train estimates have jitter  $\sigma_{\text{CRB}}$  and their rate increases from perfect  
28 rate estimation to an overestimation ratio of 3, the success rate and CosMIC scores are  
29 reduced by 49% and 40%, respectively. Both metrics are thus penalising overestima-  
30 tion, with the former metric doing so more harshly. When the jitter is larger than the  
31 CRB, the reduction in CosMIC from perfect rate estimation to overestimation is rela-  
32 tively smaller, as CosMIC is already substantially penalising the temporal discrepancy.

## 33 **5.3 Application to real imaging data**

34 On imaging data of the mouse visual cortex at a frame rate of 13 Hz, CosMIC was more  
35 sensitive than the success rate to the temporal precision of detected spikes (Fig. 7). For  
36 a detailed description of the imaging data, see Reynolds et al. (2017). Briefly, four neo-  
37 cortical layer-5 pyramidal cells were simultaneously recorded in whole-cell configura-  
38 tion, different Poisson spiking patterns were evoked by brief current pulses, and calcium  
39 transients were imaged with a two-photon laser-scanning microscope (see Abrahamson  
40 et al. 2017), thus establishing a realistic imaging data set with electrophysiological  
41 ground truth. An existing algorithm was used to detect spikes from each of 83 traces  
42 (Oñativia et al., 2013; Reynolds et al., 2016). Detected spike trains were subsequently

1 compared to the electrophysiological ground truth using CosMIC, the success rate and  
2 the STC.

3 As detailed in Section 3, the metric’s pulse width was set with respect to the CRB.  
4 On this dataset, the pulse widths were concentrated between 1 and 3 sample widths —  
5 this range encompassed 92% of the data, see (Fig. 7F). As the noise level of the data  
6 increases, so does the pulse width, see Eq. (11). Consequently, the tolerance of the  
7 metric with regards to the temporal precision of estimates also increases. As a result,  
8 estimates on noisier data (Fig. 7B) were scored with more lenience than those on less  
9 noisy data (Fig. 7A).

10 As was found on simulated data in Section 5.1, there was a linear trend between  
11 the scores of CosMIC and the success rate (Fig. 7C). CosMIC was relatively high with  
12 respect to the success rate when the temporal precision, represented by RMSE as a  
13 fraction of the pulse width, was relatively high. Conversely, CosMIC was low with  
14 respect to the success rate when the temporal precision was relatively low. This pattern  
15 was conserved when CosMIC’s ancestor metrics,  $P_{\text{CosMIC}}$  and  $R_{\text{CosMIC}}$  (Section 2.1),  
16 were compared to the precision and recall (Fig. 7D and E). The average RMSE over all  
17 traces was 27ms, or 0.37 sample widths. As CosMIC is able to discriminate precision  
18 above the pulse width, it is more able to reward this super-resolution performance than  
19 the success rate or STC.

## 20 5.4 CosMIC discriminates precision and recall of spike trains

21 By construction, CosMIC bears a strong resemblance to the Sørensen-Dice coefficient,  
22 which, in the context of spike detection, is referred to as the success rate. The success  
23 rate is the harmonic mean of the precision and recall, two intuitive metrics which rep-  
24 resent the proportion of estimates that detect a ground truth spike and the proportion  
25 of true spikes detected, respectively. In this section, we demonstrate that CosMIC can  
26 accurately discriminate both the precision and recall of spike train estimates.

27 When a spike train estimate detects exactly a subset of the true spikes, plus no  
28 remainders, CosMIC and the success rate depend only on the percentage of true spikes  
29 detected (the recall) and not the location of that subset, see Fig. 8A and D. Denoting  
30 the size of the subset of true detections as  $K - R$ , with  $K$  the number of true spikes and  
31  $0 \leq R \leq K$ , we have

$$M(\mathbf{S}, \hat{\mathbf{S}}) = 1 - \frac{1}{2K/R - 1}, \quad (19)$$

32 see Appendix A.4 for a proof. Thus, CosMIC depends only on the proportion of ‘miss-  
33 ing’ spikes,  $R/K$ , not their location. In contrast, the STC exhibited significant variation  
34 at each level of recall. This is illustrated in Fig. 8A, in which we plot the distribution  
35 of CosMIC, success rate and correlation scores over 100 realizations of spike train esti-  
36 mates at each level of recall. It can be seen that, in this setting, CosMIC and the success  
37 rate are fixed with the recall of the spike train estimates.

38 When all the true spikes were exactly detected plus  $R \geq 0$  surplus spikes, CosMIC  
39 and the success rate depend only on the level of precision not the location of the surplus  
40 spikes, see Fig. 8B and E. We have

$$M(\mathbf{S}, \hat{\mathbf{S}}) = \frac{1}{1 + R/2K}, \quad (20)$$

1 where  $K$  is the number of true spikes, see Appendix A.5 for a proof. The fall-out rate,  
2 which is the complement of the precision, is the proportion of estimates that were not  
3 deemed to have detected a ground truth spike. It is apparent from Eq. (20) that, in this  
4 setting, CosMIC depends only on the fall-out rate,  $R/K$ . The correlation, on the other  
5 hand, varied with the location of the surplus spikes. In Fig. 8E, we plot the distribution  
6 of the correlation scores for 100 realizations of spike train estimates at each level of  
7 precision. CosMIC and the success rate, which were constant (and identical) at a given  
8 precision, in this scenario, are also shown.

## 9 **5.5 Comparison with Victor-Purpura and van Rossum distances**

10 The Victor-Purpura (VP) and van Rossum (vR) spike distances were originally designed  
11 to quantify the dissimilarity between spike trains from different neurons (Victor and  
12 Purpura, 1997; van Rossum, 2001). Due to the obvious parallels between that scenario  
13 and ours, we investigated the applicability of the VP and vR metrics to scoring spike  
14 inference.

15 The vR metric initially convolves the respective spike trains with a causal expo-  
16 nential pulse and computes the Euclidean distance between the resulting pulse trains  
17 (Section 4.4). Despite the causality of the pulse, the metric score is symmetric in the er-  
18 ror of a single estimate about a true spike (Fig. 9A). The VP distance implicitly evokes  
19 a box function pulse, resulting in a piecewise linear relationship between the error of an  
20 estimate and the metric score (Fig. 9A). Although the VP distance is not defined with  
21 respect to a smoothing pulse, this interpretation follows from an analogous argument to  
22 that presented in A.2. It is known that, as the pulse width increases from small to large  
23 with respect to the interspike interval, both metrics vary between coincidence detectors  
24 and rate detectors. To the best of our knowledge, the optimal pulse width for a compro-  
25 mise between rate and timing detection is not known, so we set the widths of vR and  
26 VP with respect to CosMIC's pulse width.

27 Although it is already clear that, when the width is set correctly, VP and vR can  
28 discriminate the rate and temporal precision of spike trains with respect to one another  
29 (Paiva et al., 2010), it is not clear whether they are suitable for scoring spike train  
30 estimates. In Fig. 9B-D, we plot the scores of VP, vR and CosMIC, respectively, as  
31 the precision and recall of spike train estimates vary. We observed that vR and VP  
32 were less sensitive to the recall than the precision of spike train estimates; relatively  
33 low distances were obtained when only 50% of true spikes were detected. In contrast,  
34 CosMIC only attained a relatively high score when both the precision and recall were  
35 high (**D**). As it is crucial that a spike inference metric penalises both undetected and  
36 falsely-detected spikes, this result suggests that, without modification, VP and vR are  
37 not ideal for scoring spike train estimates.

38 The results correspond to a ground truth spike train consisting of 200 spikes gener-  
39 ated from a Poisson process with rate 1Hz. False positives were uniformly distributed  
40 about the temporal interval, whereas true positives were normally distributed about true  
41 spikes with jitter 20ms. The pulse width was set assuming a CRB of 20ms. At each  
42 level of precision and recall, results were averaged over 100 realisations of spike train  
43 estimates.

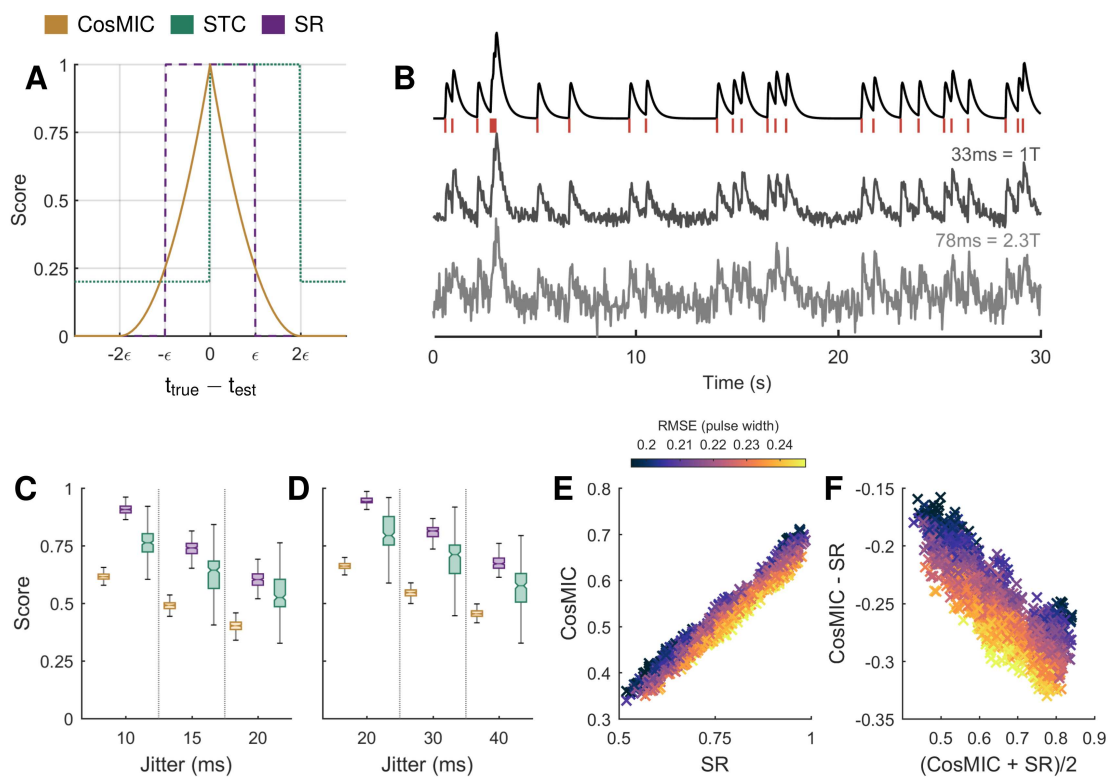

Figure 5: CosMIC was more sensitive to the temporal precision of estimates than the spike train correlation (STC) or success rate (SR). Unlike the STC, CosMIC awards estimated spikes ( $t_{\text{est}}$ ) with the same proximity to the true spike ( $t_{\text{true}}$ ) the same score (A). In contrast to both the STC and SR, CosMIC rewards increasing precision above the pulse width ( $2\epsilon$ ) with strictly increasing scores. In C and D, we plot the distribution of scores awarded to estimates that detect the correct number of spikes at varying temporal precision, in a low and high noise setting, respectively. In B, a sample of each of the following signals are plotted: the ground truth spike train, simulated as a Poisson process at rate 1Hz over 200s; the corresponding calcium transient signal, sampled with interval  $T=1/30$ s; the low and high noise fluorescence signal and the corresponding pulse widths. At each noise and jitter level, 100 realisations of spike train estimates normally distributed about the true spike times were generated. In both the low (C) and high noise (D) settings, the STC exhibited a relatively large variation in the scores awarded to estimates of the same jitter. CosMIC and the SR were roughly linearly related (E). CosMIC was boosted with respect to the success rate when temporal error, represented by the root mean square error (RMSE) of estimates as a fraction of the pulse width, was low (F). Conversely, CosMIC was relatively low with respect to the SR when temporal error was relatively high. The colormap in E and F is thresholded at the 1<sup>st</sup> and 99<sup>th</sup> percentiles of the RMSE for visual clarity.



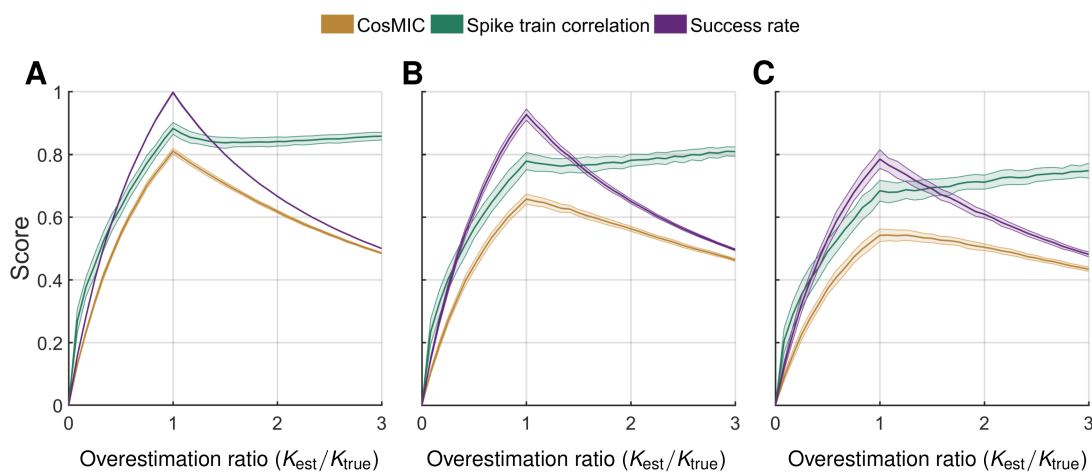

Figure 6: In contrast to the spike train correlation, CosMIC and the success rate were maximised when the correct number of spikes were detected. We display the distribution of metric scores as the number of estimated spikes ( $K_{\text{est}}$ ) varies with respect to the number of true spikes ( $K_{\text{true}}$ ). The true spike train, which was identical throughout, consisted of 200 spikes simulated from a Poisson process with spike rate 1Hz. Estimated spikes were normally distributed about the true spikes, with jitter  $\sigma_{\text{CRB}}$  (A),  $2 \sigma_{\text{CRB}}$  (B) and  $3 \sigma_{\text{CRB}}$  (C), respectively, where  $\sigma_{\text{CRB}}=20\text{ms}$ . When the number of estimated spikes was greater than the number of true spikes, estimates were distributed around a set of locations including all true spikes plus an extra subset chosen with replacement. For each metric we plot the mean (darker central line) and standard deviation (edges of shaded region) of metric scores on a set of 100 spike train estimates generated at each overestimation and jitter combination.

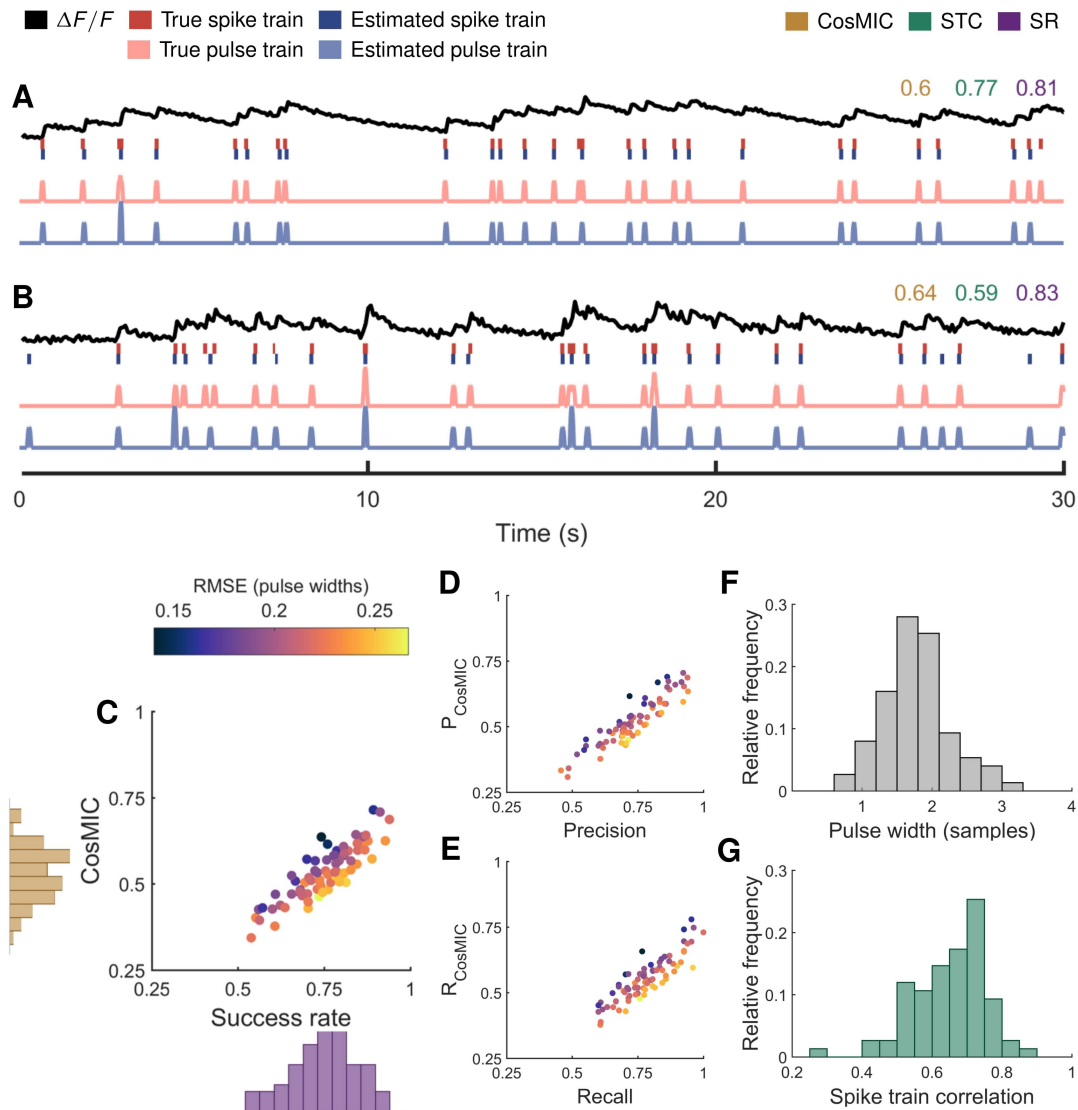

Figure 7: On mouse in vitro imaging data, CosMIC was more sensitive than the success rate (SR) to the temporal precision of detected spikes. Spikes were detected using an existing algorithm (Onativia et al. 2013; Reynolds et al. 2016) from 83 traces sampled from visual cortex slices at 13Hz. In A and B, we display from top to bottom: an example fluorescence trace ( $\Delta F/F$ ), ground truth and detected spike trains, and the corresponding pulse trains. There was an approximately linear relationship between CosMIC and the SR (C). CosMIC was relatively high with respect to the SR when temporal error, represented by root mean square error (RMSE) as a fraction of the pulse width, was relatively low. Conversely, CosMIC was low with respect to the SR when temporal error was relatively high. This pattern was conserved in the relationship between the precision and CosMIC's analogous ancestor metric,  $P_{\text{CosMIC}}$ , (D) and between the recall and  $R_{\text{CosMIC}}$  (E). The range of pulse widths as computed from the Cramér-Rao bound (F) and the range of spike train correlation (STC) scores (G) are also shown.

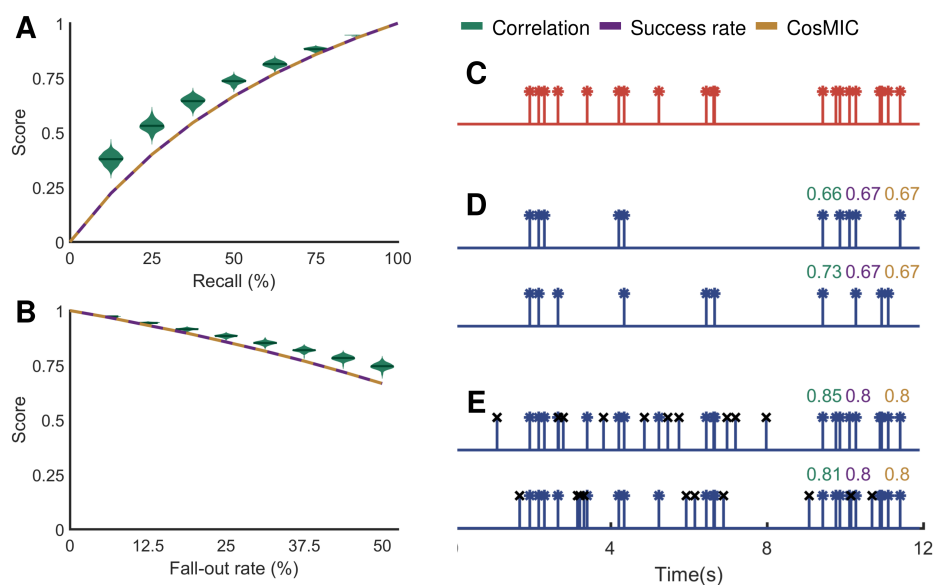

Figure 8: CosMIC scored estimated spike trains of the same recall and fall-out rate consistently, unlike the spike train correlation (STC). When a spike train estimate detected precisely the location of a subset of spikes from a true spike train, the scores of CosMIC and the success rate depended only on the percentage of spikes detected (the recall), not the location of the detected spikes (**A**, **D**). In contrast, the STC varied with the subset of spikes that were detected. When a spike train estimate detected all the true spikes precisely plus a number of surplus spikes, the STC varied with the placement of the surplus spikes (**B**, **E**). In contrast, the success rate and CosMIC depended only on the percentage of estimated spikes that did not correspond to ground truth spikes (the fall-out rate, also known as the false positive rate). The distribution of correlation scores plotted in **D** and **E** stem from 100 realizations of estimated spike trains at each recall and fall-out rate. In **C**, we plot an example of a true spike train. In **D** and **E**, we plot estimated spike trains, with a recall and fall-out rate of 50% and 33%, respectively, along with the corresponding metric scores. The spikes with a black 'x' marker in **E** indicate the surplus spikes.

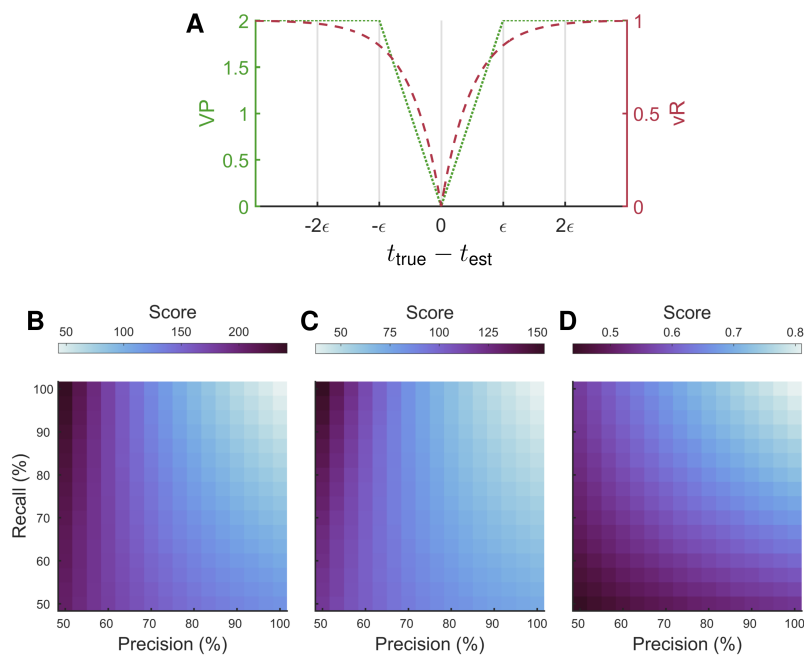

Figure 9: CosMIC was more sensitive to the precision and recall of spike train estimates than the Victor-Purpura (VP) or van Rossum (vR) spike distances. Both VP and vR are dissimilarity metrics, reaching a minimum of 0 when a true spike train and estimated spike train are equivalent. In A, this is demonstrated for one estimate ( $t_{\text{est}}$ ) of one spike ( $t_{\text{true}}$ ). The parameters of VP and vR were set with respect to CosMIC's pulse width,  $2\epsilon$ , which, in this example, was computed from a CRB of 20ms. The VP and vR distances were less sensitive to the recall than the precision of spike train estimates (B and C, respectively). CosMIC, however, only attained a relatively high score when both the precision and recall were high (D). At each level of precision and recall, the metric scores were averaged over 100 realisations of spike train estimates. The ground truth spike train contained 200 Poisson distributed spikes at rate 1Hz. False positives were uniformly distributed about the temporal interval, whereas true positives were normally distributed about true spikes with jitter 20ms.

## 6 Discussion

Much recent attention has been focused on the development of algorithms to detect spikes from calcium imaging data, while the suitability of the metrics that assess those algorithms have been predominantly overlooked. In this paper, we presented a novel metric ('CosMIC') to assess the similarity of spike train estimates compared to the ground truth. Our results demonstrate that CosMIC accurately discriminates both the temporal and rate precision of estimates with respect to the ground truth.

Using two-photon calcium imaging, the activity of neuronal populations can be monitored in vivo in behaving animals. Inferred spike trains can be used to investigate neural coding hypotheses, by analysing the rate and synchrony of neuronal activity with respect to behavioural variables. To justify such analysis, the ability of spike detection algorithms to generate accurate spike train estimates must be verified. When spike frequency is to be investigated, it is crucial that an estimate accurately matches the rate of the ground truth spike train. We have shown that the STC is not fit for this purpose; rather than penalising overestimation of the number of spikes, it is rewarded (Fig. 6). In contrast, CosMIC and the success rate are maximised when the correct number of spikes are detected. When the ultimate goal is to analyse spike timing with respect to other variables, it is critical that spikes can be detected with high temporal precision. We have shown that CosMIC has superior discriminative ability in this regard, compared to the success rate and STC (Fig. 5).

The current inconsistency in the metrics used to assess spike detection algorithms, hinders both experimentalists, aiming to select an algorithm for data analysis, and developers. In light of this problem, a recent benchmarking study tested a range of algorithms on a wide array of imaging data (Berens et al., 2017). Although informative, the study, which relied heavily on the STC to assess algorithm performance, may not provide the full picture. By introducing a new metric, we hope to complement such efforts in the pursuit of a thorough, quantitative evaluation of spike inference algorithms.

By construction, CosMIC bears a resemblance to the Sørensen-Dice coefficient, which is commonly used to compare discrete, presence/absence data (Dice, 1945; Sørensen, 1948). This metric, which is also known as the F1-score, is widely used in many fields, including ecology (Bray and Curtis, 1957) and image segmentation (Zou et al., 2004). When applied to spike inference, this coefficient is referred to as the success rate and is one of the two most commonly used metrics. We have demonstrated that this construction confers some of the advantages of the success rate to CosMIC. In particular, CosMIC is able to accurately discriminate the precision and recall of estimated spike trains (Fig. 8). We have also shown the advantages of CosMIC over the success rate; most importantly, it is more sensitive to a spike train estimate's temporal precision than the success rate (Fig. 5). Furthermore, CosMIC's parameter is defined with respect to the statistics of the dataset and unlike the success rate's bin size, it does not need to be selected by a user.

We demonstrated that CosMIC is boosted with respect to the success rate when temporal precision is relatively high. In particular, as temporal precision approaches the CRB, CosMIC increases to a maximum. It is not clear how close existing algorithms are to this theoretical bound. Nevertheless, it is important to discriminate between the temporal precision of algorithms, even if the performance is not yet optimal. For

1 example, if all algorithms produce estimates with error on the order of a sample width,  
2 it is still of interest to know which algorithm produces the lowest error. With its graded  
3 pulse shape, CosMIC is able to penalise decreasing error in this way.

4 The width of the pulse is computed from a lower bound on temporal precision (Sec-  
5 tion 3), which, in turn, is derived from the statistics of the dataset. As a result, the metric  
6 will be more lenient for spike inference algorithms on noisier or lower sampling rate  
7 data. This is due to our assumption that a metric score should reflect the difficulty of the  
8 spike inference problem. To calculate the bound, knowledge of the calcium transient  
9 pulse parameters and the standard deviation of the noise are required. These parameters  
10 are typically used by algorithms in the spike detection process (Vogelstein et al., 2010;  
11 Deneux et al., 2016). Using only one pulse amplitude parameter, which relates to the  
12 amplitude of a single spike, is a simplification. Depending on the fluorescent indicator,  
13 amplitudes do, in fact, decrease (Lütcke et al., 2013) or increase (Chen et al., 2013) at  
14 high firing rates. Consequently, CosMIC may be slightly more punitive in the former  
15 case than the latter.

16 The problem of comparing a ground truth and estimated spike train is analogous to  
17 that of comparing spike trains from different neurons. In the spike train metric literature,  
18 binless measures have been found to outperform their discrete counterparts (Paiva et al.,  
19 2010). It is also common to convolve spike trains with a smoothing pulse prior to  
20 analysis (van Rossum, 2001; Schreiber et al., 2003). In that context, the width and  
21 shape of the pulse reflect hypotheses about the relationship between neuronal spike  
22 trains. A width that is large with respect to the average interspike interval results in a  
23 metric tuned to the comparison of neuronal firing rates. Conversely, a relatively small  
24 width produces a metric that acts as a coincidence detector. To apply CosMIC to the  
25 problem of spike train comparison, one could similarly vary the pulse width to tailor its  
26 performance to the neural coding scheme. In the context of spike detection, which we  
27 view as a parameter estimation problem, the pulse width is fixed with respect to a lower  
28 bound on the precision with which a spike time can be estimated. Setting the width via  
29 this bound, which is tailored to calcium imaging data, results in a metric that assesses  
30 how accurately parameters have been estimated given the constraints of the data. This  
31 approach would need to be altered to extend CosMIC to other applications. We note  
32 that, in the absence of this pulse width, CosMIC is sufficiently universal to be applied  
33 to the comparison of any point processes.

34 Finally, we note that the developed metric is able to accurately assess an estimate's  
35 temporal and rate precision. This information is unified in a single score that sum-  
36 marises the overall performance of an algorithm. We consider a single summary score  
37 to be practical for users who do not have the time or desire to analyse multi-dimensional  
38 trade-offs. Alternatively, CosMIC's ancestor metrics,  $R_{\text{CosMIC}}$  and  $P_{\text{CosMIC}}$ , can be used  
39 to determine the extent to which errors stem from undetected or falsely-detected spikes.

## 40 Acknowledgments

41 This work was supported by European Research Council starting investigator award  
42 [grant number 277800] (Pier Luigi Dragotti); Biotechnology and Biological Sciences  
43 Research Council [grant number BB/K001817/1] (Simon R. Schultz); EU Marie Curie  
44 FP7 Initial Training Network [grant number 289146] (Simon R. Schultz); CIHR New

1 Investigator Award [grant number 288936] (P. Jesper Sjöström); CFI Leaders Oppor-  
 2 tunity Fund [grant number 28331] (P. Jesper Sjöström); CIHR Operating Grant [grant  
 3 number 126137] (P. Jesper Sjöström) and NSERC Discovery Grant [grant number 418546-  
 4 2] (P. Jesper Sjöström).

## 5 **A Appendices**

6 In the appendices, we provide derivations of some results presented in the main text.  
 7 The following notation is consistent throughout. We denote with  $x(t)$  and  $\hat{x}(t)$  the true  
 8 and estimated spike trains, see Eq. (1). We denote the triangular smoothing pulse with  
 9  $p_\epsilon(t)$ , see Eq. (2). The true and estimated pulse trains are denoted  $y(t) = x(t) * p_\epsilon(t)$   
 10 and  $\hat{y}(t) = \hat{x}(t) * p_\epsilon(t)$ , respectively. The proposed metric score, when comparing the  
 11 similarity between a ground truth set of spikes,  $S = \{t_k\}_{k=1}^K$ , with a set of estimates,  $\hat{S}$   
 12  $= \{\hat{t}_k\}_{k=1}^{\hat{K}}$ , is

$$M(S, \hat{S}) = 2 \frac{\|\min(y, \hat{y})\|}{\|y\| + \|\hat{y}\|}, \quad (\text{A.21})$$

13 where  $\|\cdot\|$  is the L1-norm.

### 14 **A.1 Alternative metric form**

15 In the following, we derive an alternative equation for CosMIC; we show that

$$M(S, \hat{S}) = 1 - \frac{\|y - \hat{y}\|}{\|y\| + \|\hat{y}\|}. \quad (\text{A.22})$$

16 We have

$$\begin{aligned} 1 - \frac{\|y - \hat{y}\|}{\|y\| + \|\hat{y}\|} &= \frac{\|y\| + \|\hat{y}\| - \|y - \hat{y}\|}{\|y\| + \|\hat{y}\|} \\ &= \frac{\int_{\mathbb{R}} y(t) + \hat{y}(t) dt - \int_{\mathbb{R}} |y(t) - \hat{y}(t)| dt}{\|y\| + \|\hat{y}\|}, \end{aligned}$$

17 where we have used the fact that  $y(t)$  and  $\hat{y}(t)$  are non-negative for all  $t \in \mathbb{R}$ . De-  
 18 composing both integrals over  $\mathbb{R}$  into their counterparts over the disjoint sets  $\{t \in \mathbb{R} :$   
 19  $y(t) > \hat{y}(t)\}$  and  $\{t \in \mathbb{R} : y(t) \leq \hat{y}(t)\}$  and subsequently combining them, we have

$$1 - \frac{\|y - \hat{y}\|}{\|y\| + \|\hat{y}\|} = \frac{2 \int_{y > \hat{y}} \hat{y}(t) dt + 2 \int_{y \leq \hat{y}} y(t) dt}{\|y\| + \|\hat{y}\|} = \frac{2 \|\min(y, \hat{y})\|}{\|y\| + \|\hat{y}\|} = M(S, \hat{S}).$$

20 Eq. (A.22) then follows.

### 21 **A.2 Score for estimate of one spike**

22 We now derive an expression for the metric score of the estimate of the location of  
 23 one spike in terms of the temporal error of the estimate,  $|u|$ . We see that, as the tem-  
 24 poral precision increases above the threshold precision ( $\epsilon$ ), the metric score increases  
 25 monotonically.

1 **Proposition 1.** *The score given to an estimate of the location of a single spike,  $t_0$ , with*  
 2 *temporal error  $u \in \mathbb{R}$  is*

$$M(t_0, t_0 + u) = \begin{cases} \left(\frac{|u|}{2\epsilon} - 1\right)^2 & \text{if } |u| < 2\epsilon \\ 0 & \text{otherwise,} \end{cases} \quad (\text{A.23})$$

3 *where  $\epsilon$  is half the width of the pulse,  $p_\epsilon(t)$ , as in Eq. (2).*

4 *Proof.* Without loss of generality, we let the true spike location be at  $t_0 = 0$ , as the  
 5 metric score depends on the relative rather than absolute locations of the estimated and  
 6 ground truth spikes. From Eq. (A.21), we have

$$M(0, u) = 2 \frac{\|\min(p_\epsilon(t), p_\epsilon(t - u))\|}{\|p_\epsilon(t)\| + \|p_\epsilon(t - u)\|}.$$

7 When  $|u| > 2\epsilon$ , the pulses do not overlap and, consequently, the numerator is equal to  
 8 0. Therefore, the metric score is zero for all  $|u| > 2\epsilon$ . For  $|u| \leq 2\epsilon$ , we write

$$M(0, u) = \frac{1}{\epsilon} \left( \int_A p_\epsilon(t) dt + \int_B p_\epsilon(t - u) dt \right), \quad (\text{A.24})$$

9 which follows from  $\|p_\epsilon\| = \epsilon$ ,  $A = \{t \in \mathbb{R} : p_\epsilon(t) < p_\epsilon(t - u)\}$  and  $B = \{t \in \mathbb{R} :$   
 10  $p_\epsilon(t) \geq p_\epsilon(t - u)\}$ . From the change of variables  $v = t + u$ , we see that  $M(0, u) =$   
 11  $M(0, -u)$ . As  $M$  is even in the second argument, we must only calculate  $M(0, u)$  for  
 12  $0 < u < 2\epsilon$ . To identify the support of  $A$  and  $B$ , we must identify the point at which  
 13  $p_\epsilon(t) = p_\epsilon(t - u)$ . We have

$$p_\epsilon(t) = p_\epsilon(t - u) \Leftrightarrow 1 - \frac{|t|}{\epsilon} = 1 - \frac{|t - u|}{\epsilon} \Leftrightarrow |t| = |t - u|.$$

14 For  $0 < u < 2\epsilon$ , the intersection point occurs in the right half of  $p_\epsilon(t)$  and the left half  
 15 of  $p_\epsilon(t - u)$ , it follows that  $t = u/2$ . Eq. (A.24) becomes

$$\begin{aligned} M(0, u) &= \frac{1}{\epsilon} \left( \int_{u/2}^{\epsilon} p_\epsilon(t) dt + \int_{u-\epsilon}^{u/2} p_\epsilon(t - u) dt \right) \\ &= \frac{1}{\epsilon} \left( \int_{u/2}^{\epsilon} p_\epsilon(t) dt + \int_{-\epsilon}^{-u/2} p_\epsilon(v) dv \right) \\ &= \frac{2}{\epsilon} \int_{u/2}^{\epsilon} p_\epsilon(t) dt, \end{aligned}$$

16 which follows from the change of variables  $v = t + u$  and the symmetry of  $p_\epsilon(t)$  about  
 17 0. Evaluating the integral, we obtain  $M(0, u) = (|u|/2\epsilon - 1)^2$ , for  $|u| < 2\epsilon$ . □

18



### 1 A.3 Metric score at precision of CRB

2 The CRB is commonly used as a benchmark for algorithm performance in parameter  
 3 estimation problems. In the context of calcium imaging, it has been previously used  
 4 to evaluate detectability of spikes under different imaging modalities (Reynolds et al.,  
 5 2015; Schuck et al., 2018). In this case, the CRB reports the minimum uncertainty  
 6 achievable by any unbiased estimator when estimating the location of one spike. We  
 7 thus set the width of the pulse to ensure that, on average, an estimate of the location of  
 8 one spike at the precision of the CRB achieves a metric score of 0.8. This benchmark  
 9 score is relatively high in the range of the metric, which is between 0 and 1, whilst  
 10 allowing leeway to be exceeded.

11 **Proposition 2.** *Let  $t_0$  denote the location of the true spike. The estimate is normally*  
 12 *distributed about the true spike at the precision of the CRB, it is modelled with the*  
 13 *random variable  $U \sim \mathcal{N}(t_0, \sigma_{\text{CRB}}^2)$ . We denote  $\beta = \sigma_{\text{CRB}}/w$ , where  $w$  is the pulse*  
 14 *width. Then, we have  $\mathbb{E}[M(t_0, U)] = 0.8$  if  $\beta$  satisfies the following equation,*

$$0.4 = (\Phi(1/\beta) - 0.5) (\beta^2 + 1) + \frac{\beta}{\sqrt{2\pi}} (\exp(-1/2\beta^2) - 2), \quad (\text{A.25})$$

15 where  $\Phi$  denotes the cumulative distribution function of the standard normal distribu-  
 16 tion.

17 *Proof.* We want to identify the pulse width at which  $0.8 = \mathbb{E}[M(t_0, U)]$ . Without loss  
 18 of generality, we consider the case where  $t_0 = 0$ . Due to the fact that  $M(0, \cdot)$  is even  
 19 and the results of Appendix A.2, we have

$$\begin{aligned} \mathbb{E}[M(0, U)] &= \int_{\mathbb{R}} M(0, u) f(u) \mathrm{d}u \\ &= 2 \int_0^w \left(\frac{u}{w} - 1\right)^2 f(u) \mathrm{d}u \\ &= \frac{2}{w^2} \int_0^w u^2 f(u) \mathrm{d}u - \frac{4}{w} \int_0^w u f(u) \mathrm{d}u + 2 \int_0^w f(u) \mathrm{d}u \\ &= \frac{2}{w^2} I_1 - \frac{4}{w} I_2 + 2I_3, \end{aligned}$$

20 where  $f(\cdot)$  is the probability density function of  $U$ . Applying integration by parts to  $I_1$ ,  
 21 we obtain

$$I_1 = \sigma_{\text{CRB}}^2 \Pr(U \in [0, w)) - \sigma_{\text{CRB}}^2 f(w)w.$$

22 The remaining integrals are  $I_2 = -\sigma_{\text{CRB}}^2 (f(w) - f(0))$  and  $I_3 = \Pr(U \in [0, w))$ ,  
 23 respectively. Putting the integrals together:

$$\mathbb{E}[M(0, U)] = 2 \left[ \Pr(U \in [0, w)) \left( \frac{\sigma_{\text{CRB}}^2}{w^2} + 1 \right) + \frac{\sigma_{\text{CRB}}^2}{w} (f(w) - 2f(0)) \right].$$

24 Writing  $\beta = \sigma_{\text{CRB}}/w$ , we have

$$\mathbb{E}[M(0, U)] = 2 \left( (\Phi(1/\beta) - 0.5) (\beta^2 + 1) + \frac{\beta}{\sqrt{2\pi}} (\exp(-1/2\beta^2) - 2) \right).$$

25

□

## 1 **A.4 Exact detection of subset of true spikes**

2 We have a set of  $K$  true spikes,  $\mathbf{S}$ , and  $\hat{K}$  estimates,  $\hat{\mathbf{S}}$ . The set of estimates contains  
 3 a subset of the ground truth spike times with the exception of  $R$  missing spikes and  
 4 no extras, such that  $\hat{K} = K - R$  with  $0 \leq R \leq K$ . Due to the distributivity of the  
 5 convolution operation

$$\hat{y}(t) = \hat{x}(t) * p_\epsilon(t) = (x(t) - x_r(t)) * p_\epsilon(t) = y(t) - r(t),$$

6 where  $x_r(t)$  and  $r(t)$  are the spike train and pulse train, respectively, of the spikes  
 7 missing from  $\hat{\mathbf{S}}$ . From the form in Eq. (A.22), the metric score becomes

$$\begin{aligned} M(y, \hat{y}) &= 1 - \frac{\|y - \hat{y}\|}{\|y\| + \|\hat{y}\|} \\ &= 1 - \frac{\|y - (y - r)\|}{\|y\| + \|y - r\|} \\ &= 1 - \frac{R\|p_\epsilon\|}{K\|p_\epsilon\| + (K - R)\|p_\epsilon\|} \\ &= 1 - \frac{1}{2K/R - 1}. \end{aligned}$$

## 8 **A.5 Exact detection of all true spikes with overestimation**

9 We have a set of  $K$  true spikes,  $\mathbf{S}$ , and  $\hat{K}$  estimates,  $\hat{\mathbf{S}}$ . The set of estimates contains all  
 10 the ground truth spike times plus  $R \geq 0$  extra spikes, such that  $\hat{K} = K + R$ . Due to the  
 11 distributivity of the convolution operator, the estimated pulse train can be written

$$\hat{y}(t) = \hat{x}(t) * p_\epsilon(t) = (x(t) + x_r(t)) * p_\epsilon(t) = y(t) + r(t),$$

12 where  $x_r(t)$  and  $r(t)$  are the spike train and pulse train, respectively, of the surplus  
 13 spikes. From the form in Eq. (A.22), the metric score becomes

$$\begin{aligned} M(\mathbf{S}, \hat{\mathbf{S}}) &= \frac{2\|\min(y, \hat{y})\|}{\|y\| + \|\hat{y}\|} \\ &= \frac{2\|\min(y, y + r)\|}{\|y\| + \|y + r\|} \\ &= \frac{2\|y\|}{2\|y\| + \|r\|} \\ &= \frac{1}{1 + \|r\|/(2\|y\|)}, \end{aligned}$$

14 where the penultimate line follows from the non-negativity of  $y$  and  $r$ . As  $\|y\| = K\|p_\epsilon\|$   
 15 and  $\|r\| = R\|p_\epsilon\|$ , it follows that

$$M(\mathbf{S}, \hat{\mathbf{S}}) = \frac{1}{1 + R/2K}.$$

## 1 **References**

- 2 Altman, D. G. and Bland, J. M. (1983). Measurement in medicine: The analysis of  
3 method comparison studies. *Journal of the Royal Statistical Society. Series D (The*  
4 *Statistician)*, 32(3):307–317.
- 5 Berens, P., Freeman, J., Deneux, T., Chenkov, N., McColgan, T., Speiser, A., Macke,  
6 J. H., Turaga, S., Mineault, P., Rupprecht, P., Gerhard, S., Friedrich, R. W., Friedrich,  
7 J., Paninski, L., Pachitariu, M., Harris, K. D., Bolte, B., Machado, T. A., Ringach,  
8 D., Reimer, J., Froudarakis, E., Euler, T., Roman-Roson, M., Theis, L., Tolias, A. S.,  
9 and Bethge, M. (2017). Community-based benchmarking improves spike inference  
10 from two-photon calcium imaging data. *bioRxiv*.
- 11 Bray, J. R. and Curtis, J. T. (1957). An ordination of the upland forest communities of  
12 southern Wisconsin. *Ecological Monographs*, 27(4):325–349.
- 13 Chen, T.-W., Wardill, T. J., Sun, Y., Pulver, S. R., Renninger, S. L., Baohan, A., Schre-  
14 iter, E. R., Kerr, R. A., Orger, M. B., Jayaraman, V., Looger, L. L., Svoboda, K., and  
15 Kim, D. S. (2013). Ultrasensitive fluorescent proteins for imaging neuronal activity.  
16 *Nature*, 499(7458):295–300.
- 17 Deneux, T., Kaszas, A., Szalay, G., Katona, K., Lakner, T., Grinvald, A., Rózsa, B.,  
18 and Vanzetta, I. (2016). Accurate spike estimation from noisy calcium signals for  
19 ultrafast three-dimensional imaging of large neuronal populations in vivo. *Nature*  
20 *Communications*, 12190.
- 21 Dice, L. R. (1945). Measures of the amount of ecologic association between species.  
22 *Ecology*, 26(3):297–302.
- 23 Dombeck, D. A., Harvey, C. D., Tian, L., Looger, L. L., and Tank, D. W. (2010).  
24 Functional imaging of hippocampal place cells at cellular resolution during virtual  
25 navigation. *Nature Neuroscience*, 13:1433–1440.
- 26 Friedrich, J., Zhou, P., and Paninski, L. (2017). Fast online deconvolution of calcium  
27 imaging data. *PLOS Computational Biology*, 13(3):1–26.
- 28 Giavarina, D. (2015). Understanding Bland Altman analysis. *Biochemia Medica*,  
29 25(2):141 – 151.
- 30 Huber, D., Gutnisky, D. A., Peron, S., O’Connor, D. H., Wiegert, J. S., Tian, L., Oertner,  
31 T. G., Looger, L. L., and Svoboda, K. (2012). Multiple dynamic representations in  
32 the motor cortex during sensorimotor learning. *Nature*, 484:473–478.
- 33 Kay, S. M. (1993). *Fundamentals of statistical signal processing*. Prentice Hall signal  
34 processing series. Prentice Hall PTR, Upper Saddle River, NJ.
- 35 Kreuz, T., Haas, J. S., Morelli, A., Abarbanel, H. D., and Politi, A. (2007). Measuring  
36 spike train synchrony. *Journal of Neuroscience Methods*, 165(1):151 – 161.

- 1 Lütcke, H., Gerhard, F., Zenke, F., Gerstner, W., and Helmchen, F. (2013). Inference of  
2 neuronal network spike dynamics and topology from calcium imaging data. *Frontiers*  
3 *in Neural Circuits*, 7:201.
- 4 Oñativia, J., Schultz, S. R., and Dragotti, P. L. (2013). A finite rate of innovation  
5 algorithm for fast and accurate spike detection from two-photon calcium imaging.  
6 *Journal of Neural Engineering*, 10(4):046017.
- 7 Pachitariu, M., Stringer, C., and Harris, K. D. (2017). Robustness of spike deconvolu-  
8 tion for calcium imaging of neural spiking. *bioRxiv*.
- 9 Paiva, A. R. C., Park, I., and Príncipe, J. C. (2010). A comparison of binless spike train  
10 measures. *Neural Computing and Applications*, 19(3):405–419.
- 11 Pappis, C. P. and Karacapilidis, N. I. (1993). A comparative assessment of measures of  
12 similarity of fuzzy values. *Fuzzy Sets and Systems*, 56(2):171 – 174.
- 13 Peron, S. P., Freeman, J., Iyer, V., Guo, C., and Svoboda, K. (2015). A cellular res-  
14 olution map of barrel cortex activity during tactile behavior. *Neuron*, 86(3):783 –  
15 799.
- 16 Pnevmatikakis, E. A., Merel, J., Pakman, A., and Paninski, L. (2013). Bayesian spike  
17 inference from calcium imaging data. In *2013 Asilomar Conference on Signals, Sys-*  
18 *tems and Computers*, pages 349–353.
- 19 Pnevmatikakis, E. A., Soudry, D., Gao, Y., Machado, T. A., Merel, J., Pfau, D., Rear-  
20 don, T., Mu, Y., Lacefield, C., Yang, W., et al. (2016). Simultaneous denoising,  
21 deconvolution, and demixing of calcium imaging data. *Neuron*, 89(2):285–299.
- 22 Rahmati, V., Kirmse, K., Marković, D., Holthoff, K., and Kiebel, S. J. (2016). Infer-  
23 ring neuronal dynamics from calcium imaging data using biophysical models and  
24 bayesian inference. *PLOS Computational Biology*, 12(2):1–42.
- 25 Reynolds, S., Abrahamsson, T., Schuck, R., Sjöström, P. J., Schultz, S. R., and Dragotti,  
26 P. L. (2017). ABLE: An activity-based level set segmentation algorithm for two-  
27 photon calcium imaging data. *eNeuro*, 4(5).
- 28 Reynolds, S., Copeland, C. S., Schultz, S. R., and Dragotti, P. L. (2016). An extension of  
29 the FRI framework for calcium transient detection. In *2016 IEEE 13th International*  
30 *Symposium on Biomedical Imaging (ISBI)*, pages 676–679.
- 31 Reynolds, S., Oñativia, J., Copeland, C. S., Schultz, S. R., and Dragotti, P. L. (2015).  
32 Spike detection using FRI methods and protein calcium sensors: performance anal-  
33 ysis and comparisons. In *11th international conference on Sampling Theory and*  
34 *Applications (SampTA 2015)*, Washington, DC, USA.
- 35 Schreiber, S., Fellous, J., Whitmer, D., Tiesinga, P., and Sejnowski, T. (2003). A  
36 new correlation-based measure of spike timing reliability. *Neurocomputing*, 52-  
37 54(Supplement C):925 – 931.

- 1 Schuck, R., Go, M. A., Garasto, S., Reynolds, S., Dragotti, P. L., and Schultz, S. R.  
2 (2018). Multiphoton minimal inertia scanning for fast acquisition of neural activity  
3 signals. *Journal of Neural Engineering*, 15(2):025003.
- 4 Sofroniew, N. J., Flickinger, D., King, J., and Svoboda, K. (2016). A large field of  
5 view two-photon mesoscope with subcellular resolution for in vivo imaging. *eLife*,  
6 5:e14472.
- 7 Sørensen, T. J. (1948). *A method of establishing groups of equal amplitude in plant*  
8 *sociology based on similarity of species content and its application to analyses of the*  
9 *vegetation on Danish commons*. København: I kommission hos E. Munksgaard.
- 10 Tada, M., Takeuchi, A., Hashizume, M., Kitamura, K., and Kano, M. (2014). A highly  
11 sensitive fluorescent indicator dye for calcium imaging of neural activity in vitro and  
12 in vivo. *European Journal of Neuroscience*, 39(11):1720–1728.
- 13 Theis, L., Berens, P., Froudarakis, E., Reimer, J., Rosón, M. R., Baden, T., Euler, T., To-  
14 lias, A. S., and Bethge, M. (2016). Benchmarking spike rate inference in population  
15 calcium imaging. *Neuron*, 90(3):471 – 482.
- 16 van Rossum, M. C. W. (2001). A novel spike distance. *Neural Computation*, 13(4):751–  
17 763.
- 18 Victor, J. D. and Purpura, K. P. (1997). Metric-space analysis of spike trains: theory,  
19 algorithms and application. *Network: Computation in Neural Systems*, 8(2):127–164.
- 20 Vogelstein, J. T., Packer, A. M., Machado, T. A., Sippy, T., Babadi, B., Yuste, R., and  
21 Paninski, L. (2010). Fast nonnegative deconvolution for spike train inference from  
22 population calcium imaging. *Journal of Neurophysiology*, 104(6):3691–3704.
- 23 Vogelstein, J. T., Watson, B. O., Packer, A. M., Yuste, R., Jedynak, B., and Paninski, L.  
24 (2009). Spike inference from calcium imaging using sequential monte carlo methods.  
25 *Biophysical Journal*, 97(2):636–655.
- 26 Zimmermann, H.-J. (2010). Fuzzy set theory. *Wiley Interdisciplinary Reviews: Com-*  
27 *putational Statistics*, 2(3):317–332.
- 28 Zou, K. H., Warfield, S. K., Bharatha, A., Tempany, C. M., Kaus, M. R., Haker, S. J.,  
29 Wells, W. M., Jolesz, F. A., and Kikinis, R. (2004). Statistical validation of image  
30 segmentation quality based on a spatial overlap index: Scientific Reports. *Academic*  
31 *Radiology*, 11(2):178 – 189.

## 32 **Figure captions**

33 Figure 5:

34

35 Figure 7:
